# Supplementary material for: Mining Proteins with Non-Experimental Annotations Based on an Active Sample Selection Strategy for Predicting Protein Subcellular Localization
Source: PLOS journal article supplement (doi:10.1371/journal.pone.0067343), 2013-06-26
Supplement: S1 (10.1371/journal.pone.0067343.s001) [file journal.pone.0067343.s001]

**Table S1.** Number of virus locative proteins

| Subcellular location       | Original training set | Supplementary training sample pool | Independent test set |
|----------------------------|-----------------------|------------------------------------|----------------------|
| Viral capsid               | 8                     | 2                                  | 1                    |
| Host cell membrane         | 33                    | 11                                 | 25                   |
| Host endoplasmic reticulum | 20                    | 18                                 | 17                   |
| Host cytoplasm             | 87                    | 116                                | 24                   |
| Host nucleus               | 84                    | 113                                | 24                   |
| Secreted                   | 20                    | 29                                 | 2                    |
| Over all                   | 252                   | 289                                | 93                   |

For the original training set consisting of 207 different proteins, 165 belong to one subcellular location, 39 to two locations, and 3 to three locations; for the supplementary training data pool consisting of 238 different proteins, 195 belong to one subcellular location, 37 to two locations, 5 to three locations, and 1 to five locations; for the independent test set consisting of 69 different proteins, 47 belong to one subcellular location, 20 to two locations, and 2 to three locations.

**Table S2.** Number of plant locative proteins

| Subcellular location  | Original training set | Supplementary training sample pool | Independent test set |
|-----------------------|-----------------------|------------------------------------|----------------------|
| Cell membrane         | 56                    | 6                                  | 46                   |
| Cell wall             | 32                    | 22                                 | 2                    |
| Chloroplast           | 286                   | 159                                | 49                   |
| Cytoplasm             | 182                   | 146                                | 37                   |
| Endoplasmic reticulum | 42                    | 6                                  | 28                   |
| Extracellular         | 22                    | 24                                 | 6                    |
| Golgi apparatus       | 21                    | 16                                 | 19                   |
| Mitochondrion         | 150                   | 174                                | 27                   |
| Nucleus               | 152                   | 245                                | 61                   |
| Peroxisome            | 21                    | 5                                  | 4                    |
| Plastid               | 39                    | 1                                  | 7                    |
| Vacuole               | 52                    | 9                                  | 15                   |
| Overall               | 1055                  | 813                                | 301                  |

For the original training set consisting of 978 different proteins, 904 belong to one subcellular location, 71 to two locations, and 3 to three locations; for the supplementary training data pool consisting of 758 different proteins, 703 belong to one subcellular location, and 55 to two locations; for the independent test set of 261 different proteins, 223 belong to one subcellular location, 36 to two locations, and 2 to three locations.

**Table S3.** Number of Gram-negative bacterium locative proteins

| Subcellular location | Original training set | Supplementary training sample pool | Independent test set |
|----------------------|-----------------------|------------------------------------|----------------------|
| Cell inner membrane  | 557                   | 22                                 | 72                   |
| Cell outer membrane  | 124                   | 25                                 | 39                   |
| Cytoplasm            | 410                   | 9                                  | 47                   |
| Extracellular        | 133                   | 41                                 | 47                   |
| Fimbrium             | 32                    | 19                                 | 6                    |
| Flagellum            | 12                    | 3                                  | 2                    |
| Nucleoid             | 8                     | 7                                  | 1                    |
| Periplasm            | 180                   | 145                                | 11                   |
| Overall              | 1456                  | 271                                | 225                  |

For the original training set consisting of 1392 different proteins, 1328 belong to one subcellular location, and 64 to two locations; for the supplementary training data pool consisting of 248 different proteins, 229 belong to one subcellular location, 15 to two locations, and 4 to three locations; for the independent test set consisting of 207 different proteins, 189 belong to one subcellular location, and 18 to two locations.
